# Supplementary material for: Isolation and characterization of Leptospira interrogans serovar Copenhageni from a dog from Saint Kitts
Source: PubMed Central journal article supplement (PMC5692236; doi:10.1099/jmmcr.0.005120), 2017-10-23

# Amplification Plot (Rn vs. Cycle)

## LipL32

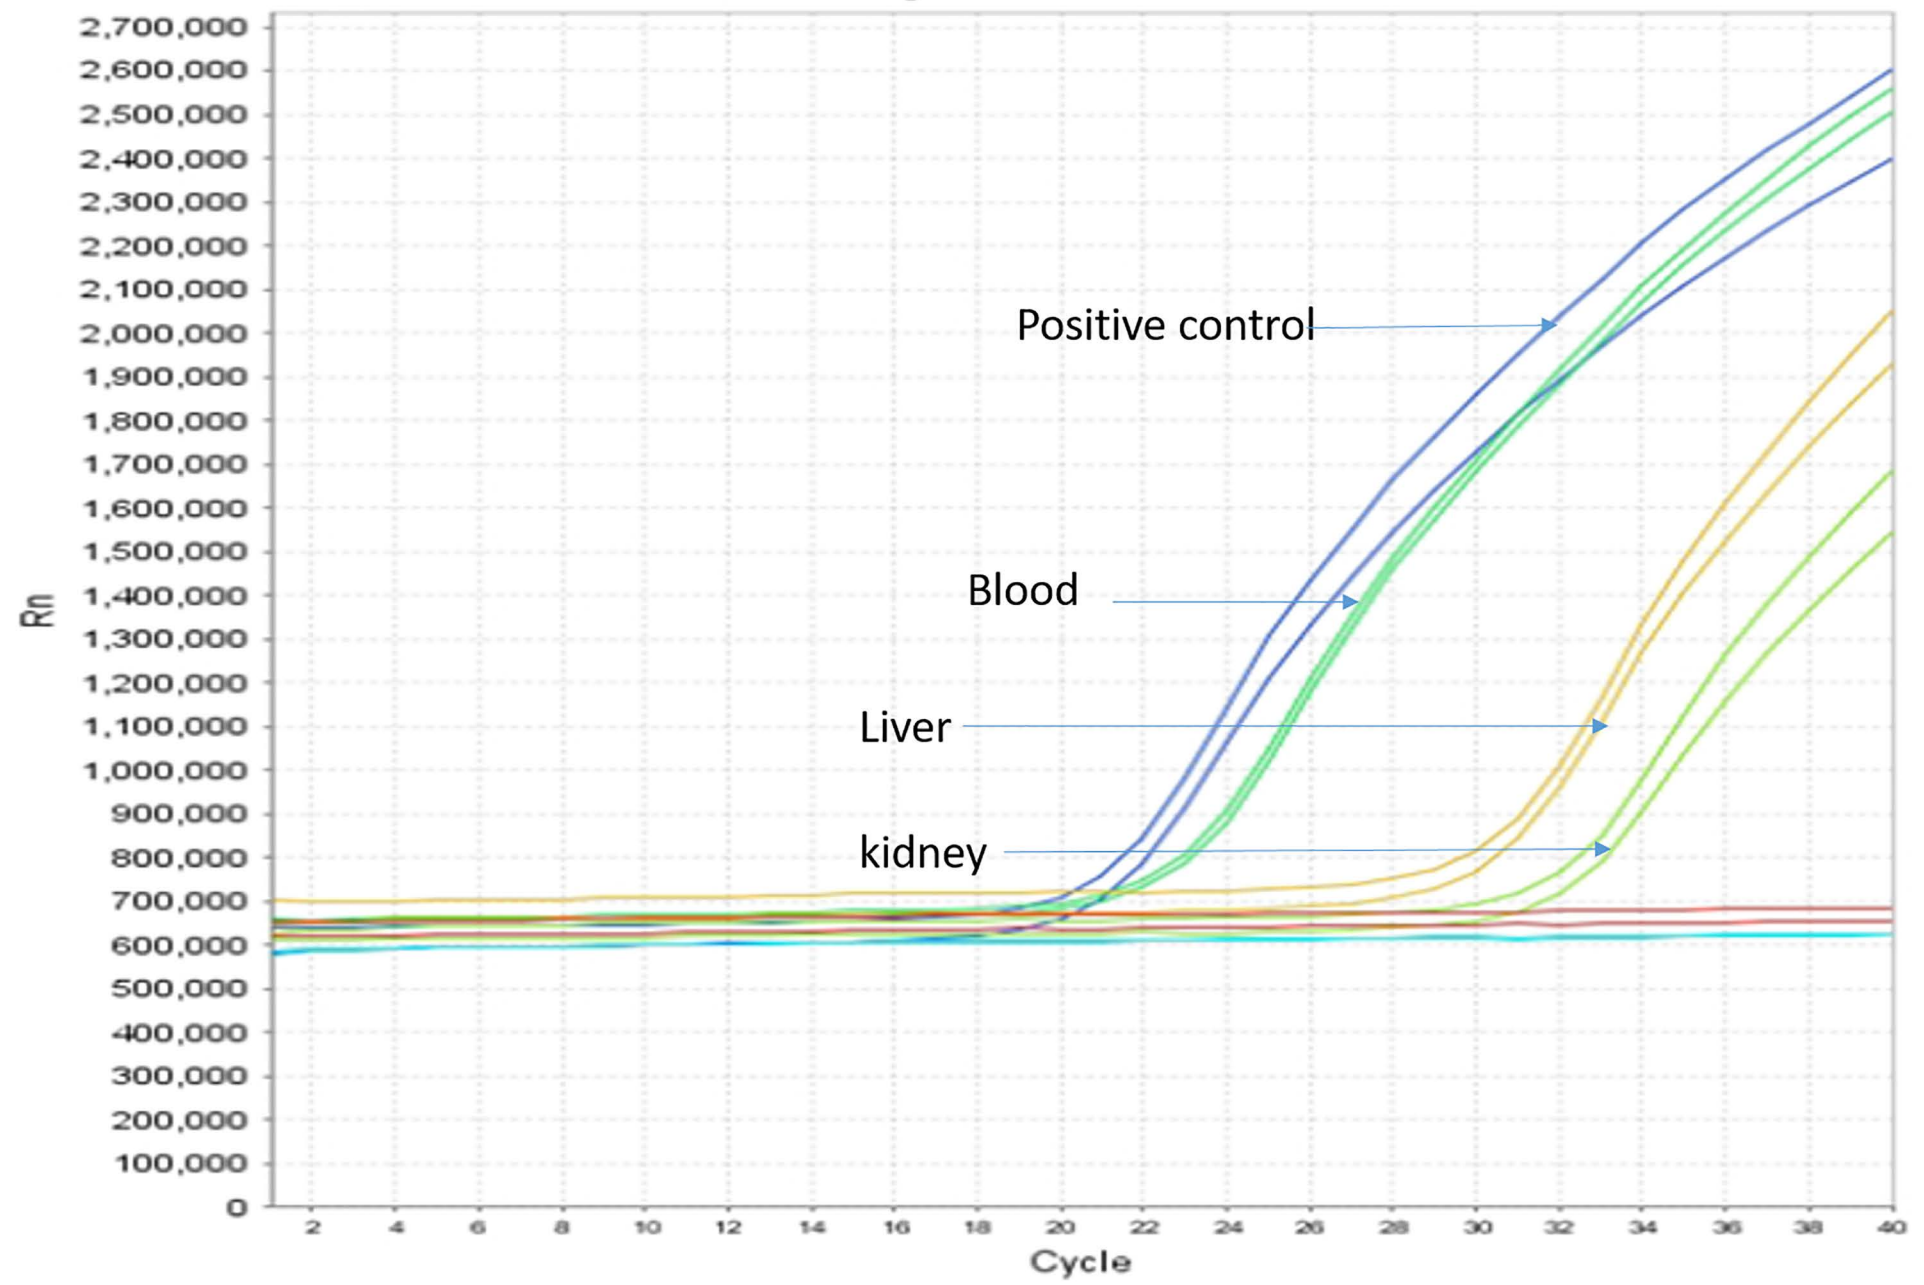

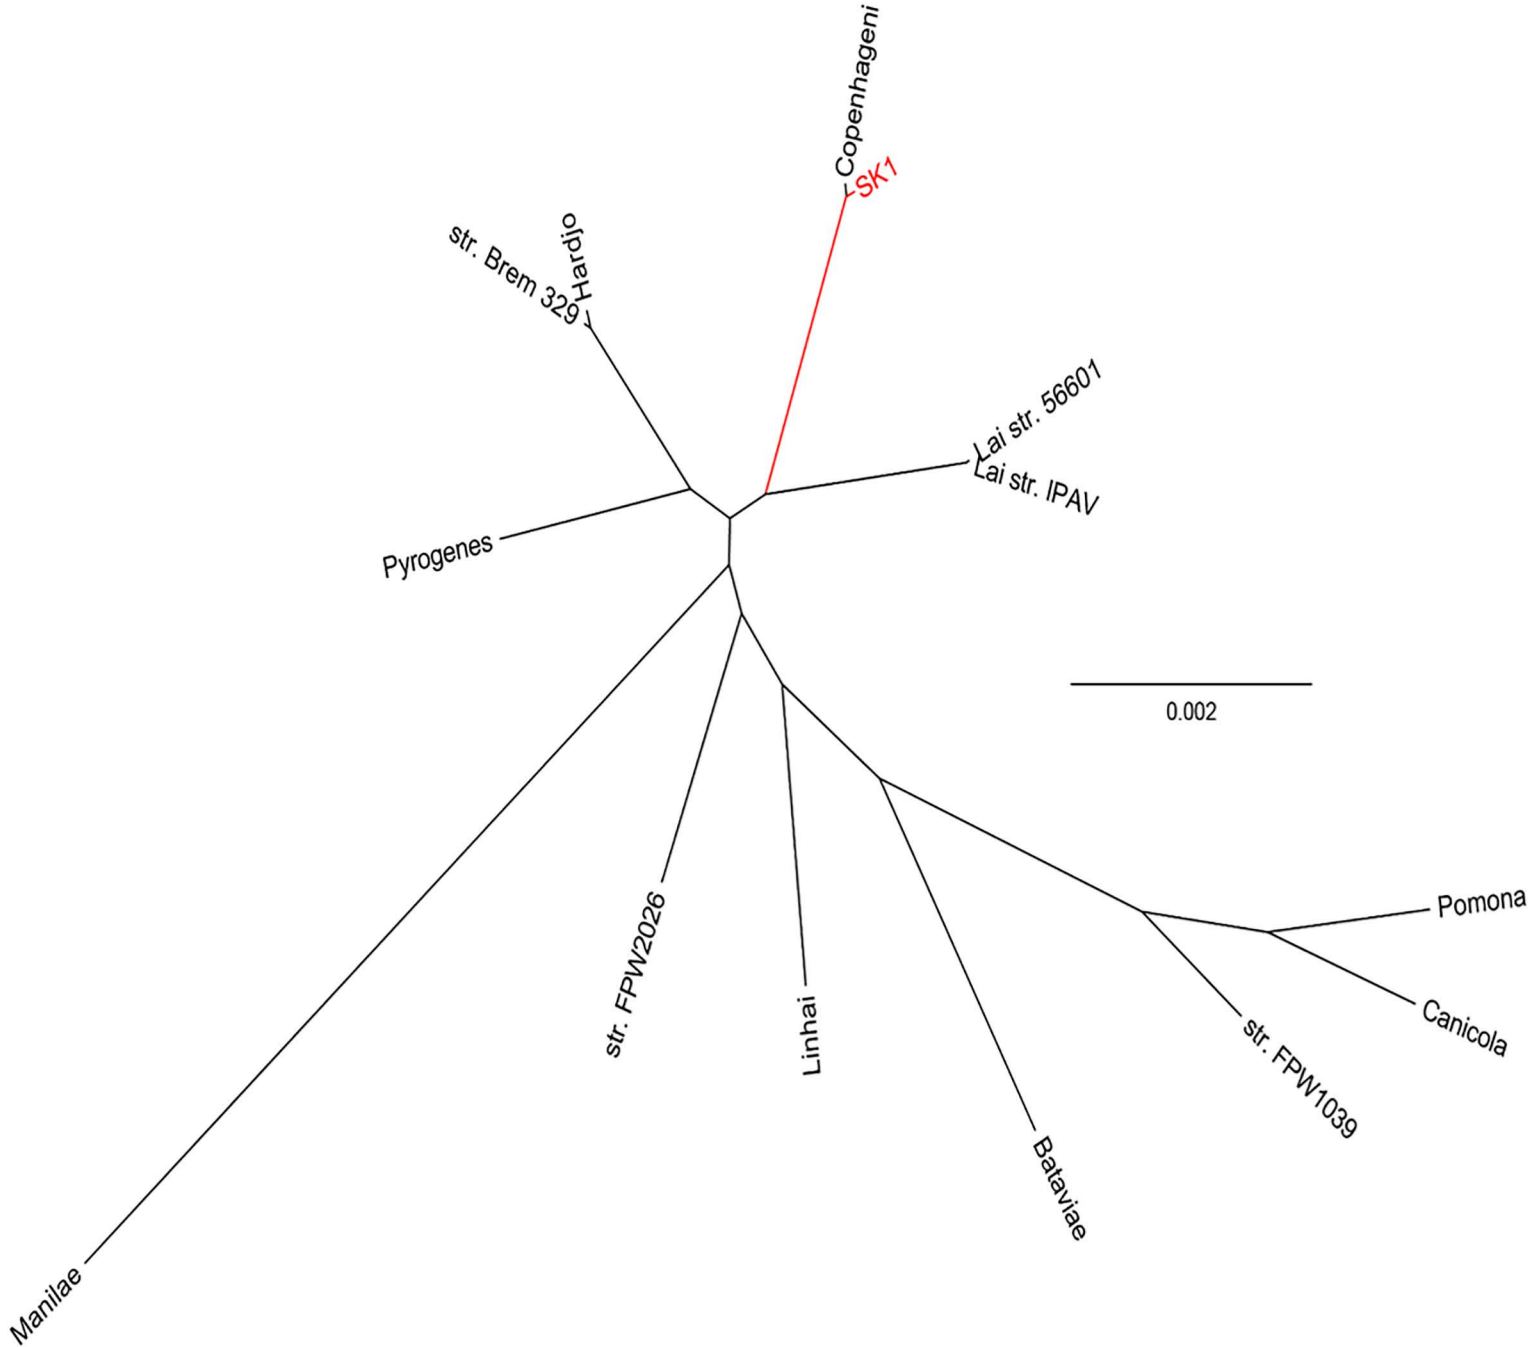

Supplement: jmmcr-4-5120-s001.pdf [file jmmcr-4-5120-s001.pdf]
